# Supplementary material for: Low Pt loaded CNTs as efficient catalysts for CO oxidation
Source: Royal Society of Chemistry journal article supplement (doi:10.1039/d3nj04139e), 2023-01-01
Supplement: d3nj04139e1.pdf [file d3nj04139e1.pdf]

## Supporting Information

### Low Pt loaded CNTs as efficient catalysts for CO oxidation

Yang Zou,<sup>a, d</sup> Xue Li,<sup>a</sup> Siqi Hu,<sup>b</sup> Yumeng Wen,<sup>b</sup> Xiaolong Liu,<sup>\*a</sup> Chunxin Lu,<sup>\*d</sup> Tingyu Zhu<sup>a, c</sup>

<sup>a</sup> CAS Key Laboratory of Green Process and Engineering, Institute of Process Engineering, Chinese Academy of Sciences, Beijing 100190, China.

<sup>b</sup> College of Biological, Chemical Sciences and Engineering, Jiaying University, Jiaying 314001, China.

<sup>c</sup> Center for Excellence in Regional Atmospheric Environment, Institute of Urban Environment, Chinese Academy of Sciences, Xiamen 361021, China

<sup>d</sup> University of Chinese Academy of Sciences, Beijing 100049, China

#### Author information

(\*) Corresponding author. Tel./Fax: +86-10-82544821.

E-mail: liuxl@ipe.ac.cn (Xiaolong Liu); chunxin.lu@zjxu.edu.cn (Chunxin Lu)



Fig. S1. Carbon oxidation curve of carbon support with temperature variation



Fig. S2. Infrared absorption spectra of g-C<sub>3</sub>N<sub>4</sub> at 506 °C and 606 °C.



**Fig. S3.** TGA curves of Pt/GO, Pt/g-C<sub>3</sub>N<sub>4</sub>, Pt/AC and Pt/CNTs (heating rate = 10 °C/min under an air atmosphere)



**Fig. S4.** CO oxidation curves of four carbon-supported Pt catalysts after H<sub>2</sub> pretreatment. Reaction conditions: 10000 ppm CO, 16% O<sub>2</sub>, N<sub>2</sub> as balance gas, WHSV: 60000 mL·g<sup>-1</sup>·h<sup>-1</sup>



**Fig. S5.** Stability test of Pt/CNTs at 230 °C. Reaction conditions: 10000 ppm CO, 16% O<sub>2</sub>, N<sub>2</sub> as balance gas, WHSV: 60000 mL·g<sup>-1</sup>·h<sup>-1</sup>



**Fig. S6.** In-situ DRIFT studies on CO absorption for Pt/CTNs at 50 °C
